# Supplementary figures and images for: Clinical Phenotyping of Polymyxin-Associated Nephrotoxicity and Phenotype-Specific Prognostic Utility of Neutrophil-to-Platelet Ratio in Carbapenem-Resistant Acinetobacter baumannii Infections
Source: Research Square preprint supplement (doi:10.21203/rs.3.rs-8146364/v1), 2025-12-01

Supplement Figure 1

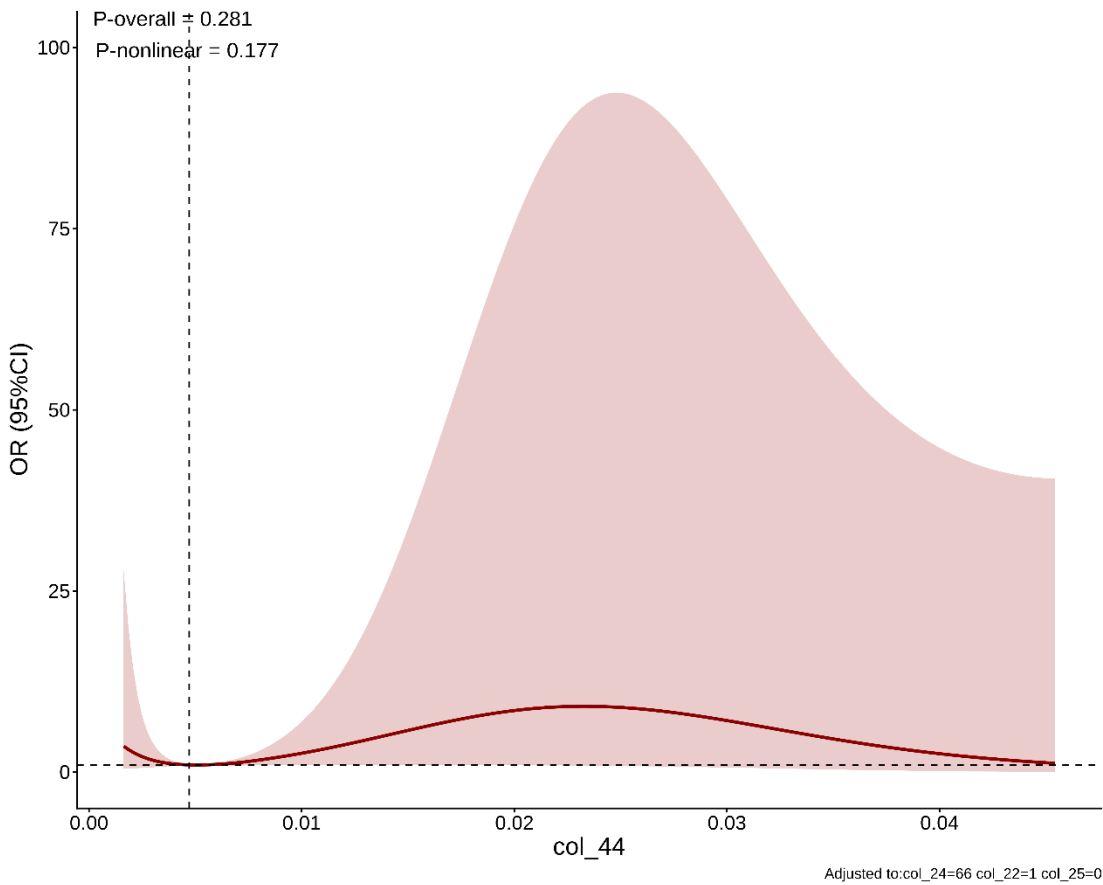

Supplement: Supplementary file 1 [file 1bf9a586990a6c96f2ab6a51.pdf]

**Supplement Figure 2**

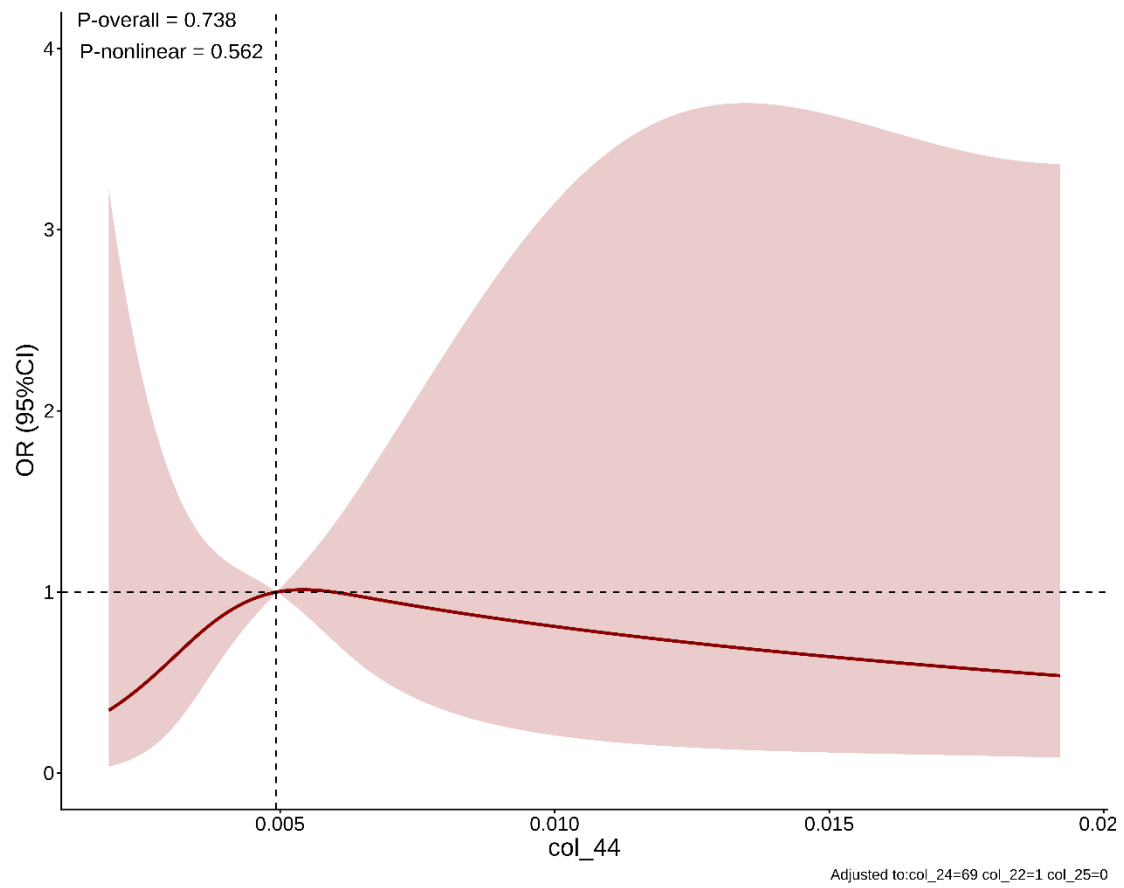

Supplement: Supplementary file 2 [file d120333bbb2c7a2adaac9da9.pdf]
